# Supplementary material for: Acid Ceramidase Depletion Impairs Neuronal Survival and Induces Morphological Defects in Neurites Associated with Altered Gene Transcription and Sphingolipid Content
Source: PubMed Central journal article supplement (PMC7084529; doi:10.3390/ijms21051607), 2020-02-26
Supplement: ijms-21-01607-s001.pdf [file ijms-21-01607-s001.pdf]

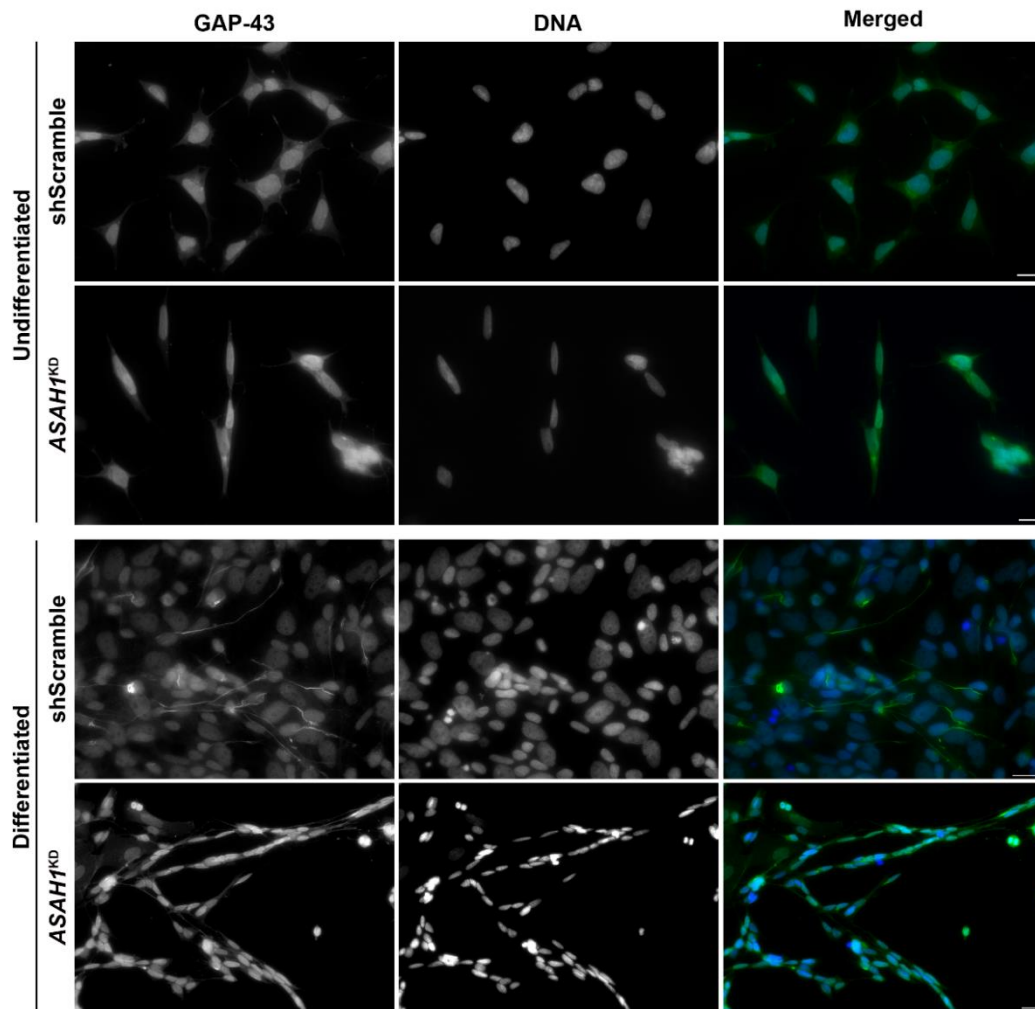

**Figure S1.** Both shScramble and *ASAH1*<sup>KD</sup> cells display the ability to differentiate after the treatment with all-*trans* retinoic acid. Immunofluorescence microscopy images of undifferentiated and differentiated shScramble and *ASAH1*<sup>KD</sup> cells stained with the GAP-43 marker (green in merged image). Nuclei were stained with Hoechst dye (blue in merged image). The scale bars correspond to 20  $\mu$ m.

**Table S1.** Primers that were used for reverse-transcription quantitative PCR.

| Oligonucleotide sequence (5' - 3') | F/R* | Target gene |
|------------------------------------|------|-------------|
| CGTTGGCTGCTAGAGCGATG               | F    | ASAH1       |
| CTGCACCTCTGTACGTTGGTC              | R    | ASAH1       |
| GCATCAACACAGGAGAGTC                | F    | ASAH2       |
| GGAGGCAGAGGCATAGAG                 | R    | ASAH2       |
| CITTCGGAATGACCGGGGTA               | F    | ACER2       |
| GCATACACAGCCCAGGTAGG               | R    | ACER2       |
| CAATGTTCCGGTGCAGTTCAGAG            | F    | ACER3       |
| GGATCCCATTCTACCCTGTG               | R    | ACER3       |
| AGTCCACCACAACAGCAC                 | F    | CERK        |
| GAGGAAGGTCTTTAAACCTG               | R    | CERK        |
| TGGTTCCTGTACATCGTGGC               | F    | CERS1       |
| CTCGGCTGTGTCATACTCCC               | R    | CERS1       |
| CATCGTCTTCGCCATTGTT                | F    | CERS2       |
| TTGTTATTGAGGATGGGGTG               | R    | CERS2       |
| GCTCTTCGAGCGATTTATTGCC             | F    | CERS5       |
| GGCCCTCCAGCCTTTTCTTA               | R    | CERS5       |
| GCTGACGAGGTTCTGTGAG                | F    | CERS6       |
| AGTTGTGAGTGGCTGATAGG               | R    | CERS6       |
| TGAGATTGCCACAATGCTGC               | F    | DEGS1       |
| TACATCGACGCCATCAGCTCCAAG           | R    | DEGS1       |
| GCCAGGACTTGATCAACCTAACC            | F    | SGMS1       |
| CCATTGGCATGGCCGTTCTTG              | R    | SGMS1       |
| CTGACTCTCGGGTTCTCTGG               | F    | SMPD1       |
| AGGTTGATGGCGGTGAATAG               | R    | SMPD1       |
| CTGGGGCATTCCGTACTTGA               | F    | SMPD2       |
| CTGGAAGTCTGCTCACTCC                | R    | SMPD2       |
| GAA GGT GAA GGT CGG AGTC           | F    | GAPDH       |
| GAA GAT GGT GAT GGG ATTTC          | R    | GAPDH       |
| ACCCTAGGGGAGACACACCG               | F    | GBA1        |
| AATTGGGTCTCTCTCGGGG                | R    | GBA1        |
| TGGGCGTCTCTAATGTCTGC               | F    | LAMP1       |
| CAGGATCACCCCGAATGTCA               | R    | LAMP1       |
| ATCGCCTGAGGCCCTCTCC                | F    | RHOA        |
| GCTCCCGCCTTGTGTGCTCA               | R    | RHOA        |
| AAC CTCCCG GGGCAAAGACAAG           | F    | RAC1        |
| AGTGTGGGACAGTGGTGCCG               | R    | RAC1        |
| ATGTTTTTGCAAGCAGTCAAGGA            | F    | DIAPH1      |
| ATCACACCTGTCTCATCGCC               | R    | DIAPH1      |
| CACCACTGTCCAAAGACTCCT              | F    | CDC42       |
| CTGCGGCTCTTCTTCGGTTC               | R    | CDC42       |

\*F/R: Forward/Reverse.

**Table S2.** Primary and secondary antibodies that were used in immunofluorescence and Western blot experiments.

|         | General information |                  |        |                  | Dilution       |                  |                  |
|---------|---------------------|------------------|--------|------------------|----------------|------------------|------------------|
|         | Name                | M/P <sup>a</sup> | Source | Supplier Details | Catalog Number | I.F <sup>b</sup> | W.B <sup>c</sup> |
| Primary | ASAH1               | P                | Rabbit | Sigma            | HPA005468      | -                | 1:1000           |
|         | Bax (2D2)           | M                | Mouse  | Santa Cruz       | Sc-20067       | -                | 1:200            |
|         | Bcl-2 (C-2)         | M                | Mouse  | Santa Cruz       | Sc-7382        | -                | 1:200            |
|         | Cyclin D1           | M                | Mouse  | Abcam            | ab6152         | -                | 1:300            |

|           |                       |   |            |                           |             |       |        |
|-----------|-----------------------|---|------------|---------------------------|-------------|-------|--------|
|           | GAP43 (7B10)          | M | Mouse      | Santa Cruz                | Sc-33705    | -     | 1:100  |
|           | GAPDH (6C5)           | M | Mouse      | Santa Cruz                | Sc-32233    | -     | 1:1000 |
|           | LAMPI (D2D11)         | M | Rabbit     | Cell Signaling Technology | 9091P       | 1:500 | 1:2000 |
|           | TUB-b (E7-c)          | M | Mouse      | Hybridoma Bank            | P07437      | 1:200 | -      |
|           | $\beta$ -Actin(C4)    | M | Mouse      | Santa Cruz                | Sc-47448    | -     | 1:500  |
| Secondary | CF <sup>TM</sup> 488A | P | Mouse IgG  | Biotium                   | 20014       | 1:500 | -      |
|           | CF <sup>TM</sup> 568  | P | Rabbit IgG | Biotium                   | 20339       | 1:500 | -      |
|           | Peroxidase conjugated | P | Mouse IgG  | Jackson ImmunoResearch    | 115-035-003 | -     | 1:2000 |
|           | Peroxidase conjugated | P | Rabbit IgG | Jackson ImmunoResearch    | 111-035-003 | -     | 1:2000 |

<sup>a</sup>M/P: Monoclonal/Polyclonal, <sup>b</sup>I.F: Immunofluorescence, <sup>c</sup>W.B: Western Blot.

**Table S3.** Summary of two-way ANOVA analysis details for all experiments.

| Figure              | F value | p value for interaction | Post-hoc test                       | p value for multiple comparisons (ASAHI <sup>KD</sup> compared to shScramble) |
|---------------------|---------|-------------------------|-------------------------------------|-------------------------------------------------------------------------------|
| 2                   | 3.968   | 0.0320                  | Dunnett's multiple comparisons test | At 24h: 0.4982 for shASAHI-1 and 0.9933 for shASAHI-2                         |
|                     |         |                         |                                     | At 48h: 0.1323 for shASAHI-1 and 0.9794 for shASAHI-2                         |
|                     |         |                         |                                     | At 72h: 0.0039 for shASAHI-1 and >0.9999 for shASAHI-2                        |
| 3                   | 30.65   | <0.0001                 | Sidak's multiple comparisons test   | 0.9949 for debris                                                             |
|                     |         |                         |                                     | <0.0001 for G1 phase                                                          |
|                     |         |                         |                                     | 0.0257 for S phase                                                            |
|                     |         |                         |                                     | <0.0001 for G2 phase                                                          |
| 8                   | 16.41   | 0.0009                  | Sidak's multiple comparisons test   | 0.2710 for aggregates                                                         |
|                     |         |                         |                                     | 0.0026 for PHOA                                                               |
|                     |         |                         |                                     | 0.1321 for RAC1                                                               |
|                     |         |                         |                                     | 0.0702 for CDC42                                                              |
| 9A                  | 2.965   | 0.0126                  | Sidak's multiple comparisons test   | 0.1304 for DIAPH1                                                             |
|                     |         |                         |                                     | >0.9999 for C14-Cer                                                           |
|                     |         |                         |                                     | 0.9114 for C16-Cer                                                            |
|                     |         |                         |                                     | 0.8887 for C18-Cer                                                            |
|                     |         |                         |                                     | 0.9963 for C18:1-Cer                                                          |
|                     |         |                         |                                     | >0.9999 for C20-Cer                                                           |
|                     |         |                         |                                     | >0.9999 for C20:1-Cer                                                         |
|                     |         |                         |                                     | 0.9994 for C22-Cer                                                            |
|                     |         |                         |                                     | >0.9999 for C22:1-Cer                                                         |
|                     |         |                         |                                     | >0.9999 for C24-Cer                                                           |
|                     |         |                         |                                     | <0.0001 for C24:1-Cer                                                         |
| >0.9999 for C26-Cer |         |                         |                                     |                                                                               |
| 9B                  | 31.95   | <0.0001                 | Sidak's multiple comparisons test   | >0.9999 for C26:1-Cer                                                         |
|                     |         |                         |                                     | >0.9999 for dhC14-Cer                                                         |
|                     |         |                         |                                     | >0.9999 for dhC16-Cer                                                         |
|                     |         |                         |                                     | >0.9999 for dhC18-Cer                                                         |

|           |        |         |                                   |                          |
|-----------|--------|---------|-----------------------------------|--------------------------|
|           |        |         |                                   | >0.9999 for dhC18:1-Cer  |
|           |        |         |                                   | <0.0001 for dhC20-Cer    |
|           |        |         |                                   | 0.9974 for dhC20:1-Cer   |
|           |        |         |                                   | >0.9999 for dhC22-Cer    |
|           |        |         |                                   | 0.9999 for dhC22:1-Cer   |
|           |        |         |                                   | >0.9999 for dhC24-Cer    |
|           |        |         |                                   | 0.9913 for dhC24:1-Cer   |
|           |        |         |                                   | >0.9999 for dhC26-Cer    |
|           |        |         |                                   | >0.9999 for dhC26:1-Cer  |
|           |        |         |                                   | >0.9999 for C14-HexCer   |
|           |        |         |                                   | 0.0107 for C16-HexCer    |
|           |        |         |                                   | >0.9999 for C18:1-HexCer |
|           |        |         |                                   | >0.9999 for C18-HexCer   |
|           |        |         |                                   | >0.9999 for C20:1-HexCer |
|           |        |         |                                   | >0.9999 for C20-HexCer   |
|           |        |         |                                   | >0.9999 for C22:1-HexCer |
|           |        |         |                                   | >0.9999 for C22-HexCer   |
|           |        |         |                                   | 0.1464 for C24:1-HexCer  |
|           |        |         |                                   | 0.6144 for C24-HexCer    |
|           |        |         |                                   | >0.9999 for C26:1-HexCer |
|           |        |         |                                   | 0.9997 for C14-SM        |
|           |        |         |                                   | <0.0001 for C16-SM       |
|           |        |         |                                   | >0.9999 for C18-SM       |
|           |        |         |                                   | >0.9999 for C18:1-SM     |
|           |        |         |                                   | >0.9999 for C20-SM       |
|           |        |         |                                   | >0.9999 for C20:1-SM     |
|           |        |         |                                   | >0.9999 for C22-SM       |
|           |        |         |                                   | >0.9999 for C22:1-SM     |
|           |        |         |                                   | >0.9999 for C24-SM       |
|           |        |         |                                   | 0.8565 for C24:1-SM      |
|           |        |         |                                   | >0.9999 for C26-SM       |
|           |        |         |                                   | >0.9999 for C26:1-SM     |
| <b>9E</b> | 0.6607 | 0.76    | N/A                               | N/A                      |
|           |        |         |                                   | 0.9961 for dhSph         |
|           |        |         |                                   | >0.9999 for dhSph-1P     |
|           |        |         |                                   | 0.0001 for Sph           |
|           |        |         |                                   | >0.9999 for Sph-1P       |
|           |        |         |                                   | <0.0001 for CERK         |
|           |        |         |                                   | 0.1254 for SMPD1         |
|           |        |         |                                   | 0.3192 for SMPD2         |
|           |        |         |                                   | 0.0484 for SGMS1         |
|           |        |         |                                   | <0.0001 for DEGS1        |
|           |        |         |                                   | 0.0092 for GBA           |
|           |        |         |                                   | 0.1178 for ASAH2         |
|           |        |         |                                   | 0.2611 for ACER2         |
|           |        |         |                                   | 0.1554 for ACER3         |
|           |        |         |                                   | 0.0008 for CERS1         |
|           |        |         |                                   | <0.0001 for CERS2        |
|           |        |         |                                   | 0.5859 for CERS5         |
| <b>9C</b> | 1.75   | 0.1297  | Sidak's multiple comparisons test |                          |
| <b>9D</b> | 11.94  | <0.0001 | Sidak's multiple comparisons test |                          |
| <b>10</b> | 16.29  | <0.0001 | Sidak's multiple comparisons test |                          |
